# Supplementary material for: High-Throughput Screening of a Corynebacterium glutamicum Mutant Library on Genomic and Metabolic Level
Source: PLoS One. 2014 Feb 4;9(2):e86799. doi: 10.1371/journal.pone.0086799 (PMC3913579; doi:10.1371/journal.pone.0086799)
Supplement: Table S1 — List of all identified insertion points of C. glutamicum transposon mutants that have been investigated by metabolic profiling. The table shows the determined position of the transposon as well as the corresponding gene locus and gene description. Additionally, for each mutant, the correlation to the wild type and the relative growth compared to the wild type are shown. (XLS) [file pone.0086799.s001.xls]

## Sheet: supplemental
	Annotation NC006958*		Annotation NC003450*							Information determined by EnzymeDetector
P7	position	locus	position	locus	gene description	operon	EC number	Pearson	%OD	EC Number	NAME_DB	EVAL_DB
P7A1	2209652	cg2328	2239621	NCgl2040	hypothetical protein			0.981976	85.2113
P7A2	1054499	cg1134	1053029	NCgl0955	anthranilate/para-aminobenzoate synthase I	+	4.1.3.-	0.454556	19.9397	4.1.3.27	anthranilate synthase	7
P7A3	1548387	cg1658	1546920	NCgl1411	major facilitator superfamily permease			0.965975	58.9435
P7A4	3103542	cg3242	3130236	NCgl2829	hypothetical protein			0.961199	106.783
P7A5	314126	cg0360	314126	NCgl0294	phosphoserine phosphatase			0.965977	72.4356	3.1.3.3	phosphoserine phosphatase	7
P7A6	375461	cg0423	375460	NCgl0346	UDP-N-acetylmuramate dehydrogenase	+	1.1.1.158	0.958347	69.6894	1.1.1.158	UDP-N-acetylmuramate dehydrogenase	73
P7A7	2820530	cg2964	2847223	intergenic near	inosine 5-monophosphate dehydrogenase		1.1.1.205	0.962975	63.6398	1.1.1.205	IMP dehydrogenase	13
P7A8	2099707	cg2207	2129657	NCgl1939	membrane-associated Zn-dependent protease 1	+		0.953596	99.4198	3.4.24.-	None	7
P7A9	1548387	cg1658	1546921	NCgl1411	major facilitator superfamily permease			0.965089	88.4749
P7A10	2333488	cg2446	2361816	NCgl2147	bifunctional glutamine-synthetase adenylyltransferase/deadenyltransferase		2.7.7.42	0.959999	67.3014	2.7.7.42	[glutamate-ammonia- ligase] adenylyltransferase	130
P7A11	2548046	cg2674	2576371	NCgl2349	hypothetical protein	+		0.952582	67.0228
P7A12	1959525	cg2065	1958053	NCgl1770	hypothetical protein			0.97996	97.39
P7B1	714125	intergenic	712652	intergenic				0.969436	90.9823	1.6.4.5	thioredoxin reductase (NADPH)	7
P7B2	2209652	cg2328	2239621	NCgl2040	hypothetical protein			0.966384	65.9482
P7B3	1033849	cg1107	1032379	NCgl0931	hypothetical protein	+		0.966728	64.3562
P7B4	not identified		not identified					0.931322	81.4701
P7B5	15971	cg0018	15971	NCgl0014	hypothetical protein			0.9794	81.2711
P7B6	not identified		not identified					0.962864	81.1119
P7B7	1958022	cg2065	1956550	NCgl1770	hypothetical protein			0.993511	102.047
P7B8	3177562	cg3330	3204256	NCgl2900	hypothetical protein			0.967685	85.8083
P7B9	2772426	cg2913	2799118	NCgl2541	ABC transporter permease	+		0.981367	88.9923
P7B10	2772426	cg2913	2799117	NCgl2541	ABC transporter permease	+		0.962802	82.5447
P7B11	2907309	cg3046	2934002	NCgl2655	serine/threonine protein kinase	+	2.7.1.-	0.982957	98.3054	2.7.11.1	non-specific serine/threonine protein kinase	64
P7B12	3105065	cg3243	3131759	NCgl2830	hypothetical protein			0.986754	100.335
P7C1	1081915	cg1166	1080446	NCgl0984	hypothetical protein			0.955901	99.3004
P7C2	741128	cg0824	739655	NCgl0688	transposase			0.963526	96.6339
P7C3	807704	intergenic	806231	intergenic				0.974533	107.778
P7C4	2207662	cg2324	2237631	NCgl2038	hypothetical protein			0.980059	104.634
P7C5	2208035	cg2324	2238004	NCgl2038	hypothetical protein			0.966296	107.459
P7C6	not identified		not identified					0.775761	50.1244
P7C7	2918882	intergenic	2945577	intergenic				0.944496	82.5247
P7C8	2918882	intergenic	2945577	intergenic				0.965599	88.508
P7C9	2742958	cg2884	2769650	NCgl2514	dipeptide/tripeptide permease			0.980728	107.361
P7C10	2907309	cg3046	2934002	NCgl2655	serine/threonine protein kinase	+	2.7.1.-	0	29.0699	2.7.11.1	non-specific serine/threonine protein kinase	64
P7C11	755386	cg0839	753913	NCgl0701	hypothetical protein	+		0.957448	82.0731
P7C12	3217077	cg3368	3243770	NCgl2935	ABC transporter ATPase	+		0.967719	104.539
P7D1	1081924	cg1166	1080455	NCgl0984	hypothetical protein			0.957312	117.239
P7D2	3174257	cg3326	3200951	intergenic				0.985923	92.0641
P7D3	807789	intergenic	806316	intergenic				0.79256	56.8416
P7D4	not identified		not identified					0.607551	44.8749
P7D5	2270896	cg2383	2299224	NCgl2091	5,10-methylenetetrahydrofolate reductase			0	15.0148	1.5.1.20	methyl enetetrahydrofolate reductase [NAD(P)H]	57
P7D6	564662	cg0642	564660	NCgl0528	hypothetical protein	+		0.971909	90.8788	2.7.9.2	pyruvate, water dikinase	14
P7D7	3278153	cg3427	3304846	NCgl2989	cell division protein ParA			-	-
P7D8	2918882	intergenic	2945577	intergenic				0.980849	87.1533
P7D9	774051	cg0844	772578	NCgl0706	type II restriction enzyme, methylase subunits	+		0.986468	82.0167
P7D10	2846997	intergenic	2873690	intergenic				0.980153	79.5895
P7D11	755459	cg0839	753986	NCgl0701	hypothetical protein	+		0.984141	99.6844
P7D12	2846997	intergenic	2873690	intergenic				0.859752	110.635
P7E1	not identified		not identified					0.904211	91.4997
P7E2	1414453	intergenic	1412986	intergenic				0.9701	87.3226
P7E3	2169082	cg2284	2199051	NCgl2002	hypothetical protein			0.987202	98.3861
P7E4	not identified		not identified					0.963322	121.924
P7E5	2846997	intergenic	2873690	intergenic				0.843934	99.1199
P7E6	2399742	cg2520	2428068	NCgl2215	hypothetical protein	+		0.95602	95.6767
P7E7	not identified		not identified					0	0
P7E8	235234	intergenic	235233	intergenic				0.981284	113.175
P7E9	774051	cg0844	772578	NCgl0706	type II restriction enzyme, methylase subunits	+		0.866561	136.883
P7E10	810268	cg0881	808795	NCgl0737	helicase	+	3.-.-.-	0.976428	101.886	3.-.-.-	None	6
P7E11	947246	cg1016	945777	NCgl0856	choline-glycine betaine transporter			0.979017	93.0802
P7E12	2846997	intergenic	2873690	intergenic				0.969084	111.87
P7F1	1080043	cg1165	1078574	NCgl0983	hypothetical protein			0.971062	85.8467
P7F2	789570	intergenic	788097	intergenic				0.924286	111.314
P7F3	1026152	cg1101	1024682	NCgl0925	ABC transporter ATP-binding component	+		0.986024	110.262	3.6.3.27	phosphate- transporting ATPase	7
P7F4	not identified		not identified					0.986505	105.32
P7F5	not identified		not identified					0.986395	86.0807
P7F6	158512	cg0183	158511	NCgl0143	threonine efflux protein	+		0.989072	94.794
P7F7	671223	cg0756	669749	NCgl0626	carbon starvation protein, membrane protein	+		0.986114	102.425
P7F8	671223	cg0756	669749	NCgl0626	carbon starvation protein, membrane protein	+		0.980861	93.8583
P7F9	not identified		not identified					0.989772	84.6187
P7F10	not identified		not identified					0.987114	93.3028
P7F11	179132	cg0206	179131	NCgl0163	major facilitator superfamily permease	+		0.779887	82.8936
P7F12	2739581	cg2878	2766273	NCgl2511	phosphoribosylamine--glycine ligase	+	6.3.4.13	0.979313	98.0103	6.3.4.13	phosphoribosylamine- glycine ligase	73
P7G1	not identified		not identified					0.986768	88.7122
P7G2	not identified		not identified					0.992906	99.2384
P7G3	568741	cg0646	568739	NCgl0531	transcriptional regulator			0.987096	108.624
P7G4	not identified		not identified					0.885004	62.8646
P7G5	not identified		not identified					0.986775	88.3028
P7G6	1553076	cg1663	1551609	NCgl1416	hypothetical protein			0.986799	109.297
P7G7	2739581	cg2878	2766273	NCgl2511	phosphoribosylamine--glycine ligase	+	6.3.4.13	0	0.994138	6.3.4.13	phosphoribosylamine- glycine ligase	73
P7G8	671223	cg0756	669749	NCgl0626	carbon starvation protein, membrane protein	+		0.988935	107.308
P7G9	3029035	cg3170	3055730	NCgl2766	hypothetical protein			0.983026	91.3437
P7G10	2291885	cg2402	2320214	NCgl2108	cell wall-associated hydrolase			0.988931	99.1506
P7G11	179132	cg0206	179131	NCgl0163	major facilitator superfamily permease	+		0.992049	113.975
P7G12	127061	cg0148	127060	NCgl0112	pantoate--beta-alanine ligase	+	6.3.2.1	0	28.0698	6.3.2.1	Pantoate-beta- alanine ligase	80
P7H1	2503582	cg2621	2531907	NCgl2305	hypothetical protein			0.988155	114.063	2.8.3.5	3-oxoacid CoA-transferase	20
P7H2	568741	cg0646	568739	NCgl0531	transcriptional regulator			0.984009	113.595
P7H3	568741	cg0646	568739	NCgl0531	transcriptional regulator			0.991647	119.063
P8	position	locus	position	locus	gene description	operon	EC number	Pearson	%OD	EC_DB	NAME_DB	EVAL_DB
P8A1	not identified		not identified					0.935333	91.6794
P8A2	368515	cg0417	368514	NCgl0340	nucleoside-diphosphate sugar epimerase	+	4.2.1.46	0.92852	89.2526	4.2.1.46	dTDP-glucose 4,6-dehydratase	20
P8A3	not identified		not identified					0	5.12326
P8A4	174132	cg0202	174131	NCgl0159	thiamine pyrophosphate-requiring enzyme	+	2.2.1.6	0.939003	98.825	2.2.1.6	acetolactate synthase	13
P8A5	not identified		not identified					0.950712	92.3536
P8A6	1121838	cg1219	1120369	NCgl1026	hypothetical protein			0.957306	77.2534
P8A7	1414614	intergenic	1413147	intergenic				0.952802	83.7249
P8A8	1939353	cg2047	1937881	intergenic				0.95382	102.735
P8A9	1336680	cg1432	1335211	NCgl1219	dihydroxy-acid dehydratase	+	4.2.1.9	0	4.58397	4.2.1.9	dihydroxy-acid dehydratase	80
P8A10	1807689	cg1923	1806217	NCgl1640	hypothetical protein			0.95623	84.9383
P8A11	3028774	cg3170	3055469	NCgl2766	hypothetical protein			0.945334	77.9275
P8A12	2910256	cg3048	2936949	NCgl2657	phosphotransacetylase	+	2.3.1.8	0.942186	96.6679	2.3.1.8	phosphate acetyltransferase	80
P8B1	2539189	cg2662	2567514	NCgl2340	aminopeptidase		3.4.11.7	0.962964	92.0839	3.4.11.7	glutamyl aminopeptidase	13
P8B2	368316	cg0417	368315	NCgl0340	nucleoside-diphosphate sugar epimerase	+	4.2.1.46	0.937427	75.3659	4.2.1.46	dTDP-glucose 4,6-dehydratase	4
P8B3	1420944	cg1528	1419477	NCgl1302	aldo/keto reductase	+	1.1.1.-	0.935178	74.4221	1.1.1.218	morphine 6-dehydrogenase	7
P8B4	68241	intergenic	68240	intergenic				0.963668	87.3651
P8B5	1064053	cg1145	1062584	NCgl0967	fumarate hydratase		4.2.1.2	0.951338	72.3998	4.2.1.2	fumarate hydratase	125
P8B6	118177	cg0138	118176	intergenic near	acyl-CoA synthetase			0.946979	81.5677
P8B7	1471411	cg1585	1469944	NCgl1345	arginine repressor ArgR	+		0.954007	107.454
P8B8	155550	cg0178	15554	NCgl0139	HrpA-like helicase		3.-.-.-	0.944771	91.9491	3.6.4.13	RNA helicase	7
P8B9	660122	cg0745	658661	NCgl0616	NAD-dependent deacetylase	+		0.957158	77.7927	3.5.1.-	None	7
P8B10	1933404	cg2040	1931932	NCgl1745	transcriptional regulator			0.969764	88.8482
P8B11	3192814	cg3345	3219507	NCgl2914	hypothetical protein			0.948306	112.981
P8B12	2910256	cg3048	2936949	NCgl2657	phosphotransacetylase	+	2.3.1.8	0.961768	98.0161	2.3.1.8	phosphate acetyltransferase	80
P8C1	3003961	intergenic	3030656	intergenic near	aminotransferase			0.969227	80.0847	2.6.1.2 2.6.1.66 2.6.1.1	alanine transaminase valine-pyruvate transaminase aspartate transaminase	15
P8C2	2270842	cg2383	2299170	NCgl2091	5,10-methylenetetrahydrofolate reductase			0	4.58397	1.5.1.20	methyl enetetrahydrofolate reductase [NAD(P)H]	57
P8C3	211477	intergenic	211476	intergenic near	FAD/FMN-containing dehydrogenase			0.951359	139.542	1.1.3.8	L-gulonolactone oxidase	20
P8C4	691449	cg0777	689976	NCgl0645	ABC transporter ATPase	+		0.954633	111.229	3.6.3.34	iron-chelate- transporting ATPase	7
P8C5	1633427	cg1743	1631960	NCgl1487	hypothetical protein	+		0.946866	93.8366	1.1.1.94	glycerol-3-phosphate dehydrogenase [NAD(P)+]	7
P8C6	not identified		not identified					0.914898	91.8225
P8C7	1083617	cg1169	1082148	NCgl0986	SNF family Na(+)-dependent transporter	+		0.948663	94.7929
P8C8	not identified		not identified					0.967686	87.3024
P8C9	725512	cg0808	724039	NCgl0674	acyltransferase			0.960642	90.9185
P8C10	429255	cg0485	429256	NCgl0393	hypothetical protein			0.969401	93.5014
P8C11	1160830	cg1264	1159362	NCgl1068	hypothetical protein	+		0.937219	82.9115
P8C12	1100264	cg1193	1098794	NCgl1004	hypothetical protein	+		0.954026	79.1663	4.1.1.44	4-carboxy muconolactone decarboxylase	7
P8D1	42377	cg0057	42377	NCgl0040	serine/threonine protein kinase	+	2.7.1.-	0.967332	87.6899	2.7.11.1	non-specific serine/threonine protein kinase	114
P8D2	1557671	intergenic	1556204	intergenic				0.966891	90.6602
P8D3	3112879	intergenic	3139573	intergenic near	inner membrane protein translocase YidC			0.974152	86.6567
P8D4	not identified		not identified					0.922671	42.2306
P8D5	1803834	cg1917	1802362	NCgl1634	hypothetical protein			0.968221	101.379
P8D6	193834 / 2237325	cg0226	193833	NCgl0179	transposase			0.957072	92.3391
P8D7	not identified		not identified					0.95379	72.8381
P8D8	2228940	cg2344	2258908	NCgl2055	cysteine synthase	+		0.927059	84.203	2.5.1.47	cysteine synthase	7
P8D9	not identified		not identified					0.885044	92.8557
P8D10	157771	cg0182	157770	NCgl0142	3-methyladenine DNA glycosylase	+	3.2.2.20	0.957949	82.7823	3.2.2.20	DNA-3-methyladenine glycosylase I	13
P8D11	940821	cg1009	939352	NCgl0850	cyanate permease	+		0.904443	80.8452
P8D12	2228337	cg2343	2258305	intergenic		+		0.962098	94.922	4.1.1.20	Diaminopimelate decarboxylase	14
P8E1	559547	cg0637	559545	NCgl0523	NAD-dependent aldehyde dehydrogenase	+	1.2.1.8	0.962652	109.257	1.2.1.8	betaine-aldehyde dehydrogenase	13
P8E2	559547	cg0637	559545	NCgl0523	NAD-dependent aldehyde dehydrogenase	+	1.2.1.8	0.968665	93.6306	1.2.1.8	betaine-aldehyde dehydrogenase	13
P8E3	not identified		not identified					0.953163	71.2884
P8E4	not identified		not identified					0.967914	98.1507
P8E5	3112843	intergenic	3139537	intergenic near	inner membrane protein translocase YidC			0.970709	108.87
P8E6	not identified		not identified					0.965683	87.9482
P8E7	559547	cg0637	559545	NCgl0523	NAD-dependent aldehyde dehydrogenase	+	1.2.1.8	0.966515	87.3024	1.2.1.8	betaine-aldehyde dehydrogenase	13
P8E8	not identified		not identified					0.961023	113.519
P8E9	1245037	cg1337	1243569	NCgl1136	homoserine dehydrogenase	+	1.1.1.3	0	4.64924	1.1.1.3	homoserine dehydrogenase	80
P8E10	691170	cg0776	689697	NCgl0644	ABC transporter periplasmic component	+		0.942137	86.6567
P8E11	539362	cg0607	539363	NCgl0498	hypothetical protein			0.972218	90.0145
P8E12	358086	cg0410	358085	NCgl0333	serine protease	+	3.4.21.26	0.979812	96.9116	3.4.21.26	prolyl oligopeptidase	20
P8F1	1412347	cg1520	1410880	NCgl1294	hypothetical protein			-	86.2136
P8F2	2649147	intergenic	2677474	intergenic near	ribonucleotide-diphosphate reductase subunit alpha			0.988407	82.8154	1.17.4.1	ribonucleoside- diphosphate reductase	13
P8F3	not identified		not identified					0.991167	84.8291
P8F4	1044222	cg1121	1042752	NCgl0944	hypothetical protein			0.967219	74.5087
P8F5	not identified		not identified					0.991044	81.8085
P8F6	not identified		not identified					0.986964	88.9825
P8F7	1303751	cg1395	1302283	NCgl1190	hypothetical protein			0.975802	97.1633
P8F8	not identified		not identified					0.977433	100.31
P8F9	1718879	cg1826	1717410	NCgl1558	Xaa-Pro aminopeptidase		3.4.11.9	0.98311	86.5912	3.4.11.9	Xaa-Pro aminopeptidase	20
P8F10	2352335	cg2466	2380663	NCgl2167	pyruvate dehydrogenase subunit E1		1.2.4.1	0.94915	48.4558	1.2.4.1	pyruvate dehydrogenase (acetyl- transferring)	63
P8F11	1048942	cg1129	1047472	NCgl0950	phospho-2-dehydro-3-deoxyheptonate aldolase	+	2.5.1.54	0.982717	100.436	2.5.1.54	3-deoxy-7- phosphoheptulonate synthase	80
P8F12	1144120	cg1246	1142652	NCgl1051	hypothetical protein	+		0.928771	54.6229
P8G1	not identified		not identified					0.986232	86.5912
P8G2	2482442 / 1116019	cg2600	2510767	NCgl2284	transposase			0.992891	91.8773
P8G3	1692430	cg1798	1690962	NCgl1533	bifunctional 3,4-dihydroxy-2-butanone 4-phosphate synthase/GTP cyclohydrolase II protein	+	3.5.4.25	0.938885	39.7715	4.1.99.12	3,4-dihydroxy-2- butanone-4- phosphate synthase	67
P8G4	1138181	cg1237	1136713	NCgl1042	hypothetical protein			0.99243	99.8064
P8G5	1077222	cg1162	1075753	NCgl0980	exodeoxyribonuclease VII small subunit	+	3.1.11.6	0.991116	80.1723	3.1.11.6	exodeoxyribonuclease VII	13
P8G6	2477986	cg2597	2506311	NCgl2281	ribonuclease E		3.1.4.-	0.955936	68.3416	3.1.26.12	ribonuclease E	7
P8G7	2918889	intergenic	2945584	intergenic				0.987306	118.182
P8G8	2035873	cg2146	2065824	NCgl1882	hypothetical protein			0.966029	105.092
P8G9	3243236	cg3393	3269929	NCgl2959	hypothetical protein	+		0.99334	87.4722
P8G10	643183	cg0727	641722	NCgl0603	nucleoside-diphosphate-sugar epimerase			0.991523	96.0306
P8G11	not identified		not identified					0	11.8308
P8G12	1400200	cg1506	1398733	NCgl1280	hypothetical protein			0.984375	95.0237
P8H1	1695368	cg1801	1693900	NCgl1536	ribulose-phosphate 3-epimerase	+	5.1.3.1	0	27.9408	5.1.3.1	ribulose-phosphate 3-epimerase	18
P8H2	620549	cg0702	619088	NCgl0581	transcriptional regulator	+		0.987069	130.768
P8H3	385378	cg0438	385377	NCgl0353	cell wall biogenesis glycosyltransferase		2.4.-.-	0.96811	121.958	2.4.-.-	None	13
P8H4	3097327	cg3232	3124021	NCgl2821	hypothetical protein			0.987974	85.4584
P8H5	2299715	intergenic	2328044	intergenic near	cytochrome C oxidase subunit II			0.986313	112.141	1.9.3.1	cytochrome-c oxidase	80
P21	position	locus	position	locus	gene description	operon	EC number	Pearson	%OD	EC_DB	NAME_DB	EVAL_DB
P21A1	698775	cg0783	697302	NCgl0651	hypothetical protein			0.953975	99.3269
P21A3	not identified		not identified					0	0
P21A3	1503225	cg1613	1501758	NCgl1369	rhodanese-related sulfurtransferase			0.949898	102.727	2.8.1.2	3-mercaptopyruvate sulfurtransferase	7
P21A4	2779925	cg2922	2806617	NCgl2550	transcriptional regulator			0.973711	97.5668
P21A5	129859	cg0151	129858	NCgl0115	3-methyladenine DNA glycosylase			0.983093	92.1264	3.2.2.21	DNA-3-methyladenine glycosylase II	7
P21A6	62161	cg0079	62161	NCgl0059	hypothetical protein	+		0.948637	91.8064
P21A7	1133521	cg1233	1132053	NCgl1039	hypothetical protein	+		0.991843	96.5267
P21A8	1955640	cg2064	1954168	NCgl1769	topoisomerase IA		5.99.1.2	0.965744	89.4062	5.99.1.2	DNA topoisomerase	20
P21A9	612415	cg0692	1115778	NCgl1021	transposase	+		0.988375	90.2063
P21A10	1695383	cg1801	1693915	NCgl1536	ribulose-phosphate 3-epimerase	+	5.1.3.1	0	11.3608	5.1.3.1	ribulose-phosphate 3-epimerase	18
P21A11	267215	cg0303	267214	NCgl0245	2-isopropylmalate synthase		2.3.3.13	0	6.32044	2.3.3.13	2-isopropylmalate synthase	80
P21A12	267215	cg0303	267214	NCgl0245	2-isopropylmalate synthase		2.3.3.13	0	6.04042	2.3.3.13	2-isopropylmalate synthase	80
P21B1	698775	cg0783	697302	NCgl0651	hypothetical protein			0.959248	86.686
P21B2	2727634	cg2868	2754327	NCgl2503	extracellular nuclease			0.98702	94.0465
P21B3	1336015	cg1432	1334546	NCgl1219	dihydroxy-acid dehydratase	+	4.2.1.9	0	4.72033	4.2.1.9	dihydroxy-acid dehydratase	80
P21B4	not identified		not identified					0.843742	92.2864
P21B5	1133545	cg1233	1132077	NCgl1039	hypothetical protein	+		0.946202	87.8061
P21B6	2211466	cg2329	2241435	NCgl2041	coenzyme F420-dependent N5,N10-methylene tetrahydromethanopterin reductase			0.990768	93.6465
P21B7	2739477	cg2878	2766169	NCgl2511	phosphoribosylamine--glycine ligase	+	6.3.4.13	0.984714	81.5657	6.3.4.13	phosphoribosylamine- glycine ligase	73
P21B8	1222507	cg1316	1221039	NCgl1117	helicase	+		0.928949	98.0468
P21B9	908863	cg0972	907392	NCgl0816	cyanate permease	+		0.983214	88.6862
P21B10	1414676	intergenic	1413209	intergenic				0.986639	85.6859
P21B11	3167501	cg3320	3194195	NCgl2891	ABC transporter permease	+		0.978247	86.886
P21B12	1181942	cg1282	1180474	NCgl1086	hypothetical protein	+		0.98927	98.4868
P21C1	698775	cg0783	697302	NCgl0651	hypothetical protein			0.975486	96.6467
P21C2	71831	cg0089	71830	NCgl0067	two-component system sensory transduction histidine kinase	+	2.7.3.-	0.985847	104.367	2.7.13.3	histidine kinase	7
P21C3	71831	cg0089	71830	NCgl0067	two-component system sensory transduction histidine kinase	+	2.7.3.-	0.964686	99.2469	2.7.13.3	histidine kinase	7
P21C4	57896	intergenic	1132072	NCgl1039	hypothetical protein			0.978694	104.607
P21C5	1119769	cg1216	1118300	NCgl1024	quinolinate synthetase	+		0	21.3215	2.5.1.72	quinolinate synthase	67
P21C6	931716	cg0997	930246	NCgl0840	two-component system, sensory transduction histidine kinase	+		0.972394	96.0682	2.7.13.3	histidine kinase	14
P21C7	2739477	cg2878	2766169	NCgl2511	phosphoribosylamine--glycine ligase	+	6.3.4.13	0.958284	97.6082	6.3.4.13	phosphoribosylamine- glycine ligase	73
P21C8	1684911	cg1791	1683443	NCgl1526	glyceraldehyde-3-phosphate dehydrogenase	+	1.2.1.12	0		1.2.1.12	glyceraldehyde-3- phosphate dehydrogenase (phosphorylating)	72
P21C9	not identified		not identified					0.985882	93.938
P21C10	2835405	intergenic	2862098	intergenic near	lysyl-tRNA synthetase			0.975348	87.7781	2.3.2.3	lysyltransferase	5
P21C11	2835405	intergenic	2862098	intergenic near	lysyl-tRNA synthetase			0.984334	88.8561	2.3.2.3	lysyltransferase	5
P21C12	182399	cg0210	182398	NCgl0167	transcriptional regulator			0.983524	94.0663
P21D1	2447574	cg2564	2475898	NCgl2252	hypothetical protein			0.984251	100.996
P21D2	3092893	cg3226	3119587	intergenic near	L-lactate dehydrogenase	+		0.967677	81.4386	1.1.2.3	L-lactate dehydrogenase (cytochrome)	13
P21D3	2543567	cg2666	2571892	NCgl2343	hypothetical protein	+		0.976977	85.9045
P21D4	2810055	cg2953	2836747	NCgl2578	NAD-dependent aldehyde dehydrogenase		1.2.1.28	0.981453	94.3743	1.1.2.3	aldehyde dehydrogenase (NAD+)	7
P21D5	2699393	cg2838	2727723	NCgl2478	dithiol-disulfide isomerase	+		0.98218	91.8847
P21D6	not identified		not identified					0.988308	86.5461
P21D7	1028451	cg1103	1026981	NCgl0927	hypothetical protein	+		0.974963	79.5906
P21D8	1643102	cg1753	1641635	NCgl1493	ABC transporter duplicated ATPase			0.969199	81.3872
P21D9	not identified		not identified			+		0.984795	83.0812
P21D10	not identified		not identified					0.966946	90.5757
P21D11	564191	cg0642	564189	NCgl0528	hypothetical protein	+		0.970801	85.9045	2.7.9.2	pyruvate, water dikinase	14
P21D12	915034	cg0977	913563	NCgl0821	ABC transporter permease	+		0.964494	98.8659	3.6.4.12	DNA helicase	7
P21E1	2544918	cg2670	2573243	NCgl2346	hypothetical protein	+	1.3.-.-	0.980401	91.474	1.3.-.-	None	6
P21E2	3146407	cg3291	3173101	NCgl2868	hypothetical protein			0.986238	93.168
P21E3	2101802	cg2211	2131752	NCgl1941	hypothetical protein			0.988684	90.3704
P21E4	1647439	cg1757	1645972	NCgl1496	transposase			0.987101	100.842
P21E5	2419220	cg2538	2447546	NCgl2229	coenzyme F420-dependent N5,N10-methylene tetrahydromethanopterin reductase	+	1.14.14.3	0.960486	99.1225	1.14.14.3	alkanal monooxygenase (FMN)	20
P21E6	not identified		not identified					0	1.20631
P21E7	1058787	cg1140	1057317	NCgl0961	allophanate hydrolase subunit 1	+		0.973958	102.536
P21E8	58184	cg0076	58184	NCgl0056	hypothetical protein			0.978756	106.412
P21E9	1527089	cg1639	1525622	NCgl1392	hypothetical protein	+		0.977644	98.5322
P21E10	673592	cg0759	672119	NCgl0628	hypothetical protein	+		0.975938	87.9571	4.2.1.79	2-Methylcitrate dehydratase	67
P21E11	1237863	intergenic	1236395	intergenic				0.969413	95.0509
P21E12	1036401	intergenic	1034931	intergenic near	phosphopyruvate hydratase			0	4.80711	4.2.1.11	phosphopyruvate hydratase	80
P21F1	1457984	cg1573	1456517	NCgl1334	rRNA methylase		2.1.1.-	0.65916	94.2713	2.1.1.34	tRNA guanosine-2-O- methyltransferase	7
P21F2	2544918	cg2670	2573243	NCgl2346	hypothetical protein	+	1.3.-.-	0.955926	91.8288	1.3.-.-	None	6
P21F3	2632347	cg2767	2660674	NCgl2426	hypothetical protein	+		0.962885	91.439
P21F4	360365	intergenic	360375	intergenic				0.984825	100.949
P21F5	178110	cg0205	178109	NCgl0162	sugar phosphate isomerase/epimerase	+		0.992059	95.8564
P21F6	761759	cg0841	2054773	NCgl1871	hypothetical protein			0.981319	86.1382
P21F7	3174059	intergenic	3200753	intergenic				0.972577	80.0059
P21F8	1841438	cg1960	1839966	NCgl1670	hypothetical protein	+		0.99105	91.2572
P21F9	761759	cg0841	2054773	NCgl1871	hypothetical protein			0.968408	94.6091
P21F10	2349607	cg2462	2377935	NCgl2163	transcriptional regulator	+		0.9895	88.4508
P21F11	2821489	cg2964	2848182	NCgl2586	inosine 5-monophosphate dehydrogenase		1.1.1.205	0.990657	86.3201	1.1.1.205	IMP dehydrogenase	13
P21F12	443087	cg0501	443088	NCgl0406	major facilitator superfamily permease	+		0.987422	90.4776
P21G1	not identified		not identified					0.922571	80.1878
P21G2	not identified		not identified					0.98801	78.7587
P21G3	not identified		not identified					0.983811	90.5816
P21G4	2840954	cg2984	2867647	NCgl2603	cell division protein		3.4.24.-	0.970917	87.2036	3.4.24.-	None	13
P21G5	146161	cg0168	146160	NCgl0130	permease			0.987788	97.5973
P21G6	146161	cg0168	146160	NCgl0130	permease			0.983229	97.6753
P21G7	1767110	cg1873	1765638	NCgl1600	acyl-CoA thioesterase		3.1.2.-	0.972679	88.7367	3.1.2.-	None	13
P21G8	2304656	cg2414	2332985	NCgl2120	nicotinate-nucleotide--dimethylbenzimidazole phosphoribosyltransferase	+	2.4.2.21	0.978588	95.8564	2.4.2.21	nicotinate- nucleotide- dimethyl benzimidazole phosphoribosyl transferase	80
P21G9	3217283	cg3368	3243976	NCgl2936	ABC transporter permease	+		0.990811	96.7399
P21G10	not identified		not identified					0	1.35119
P21G11	199699	cg0229	199693	NCgl0181	glutamine 2-oxoglutarate aminotransferase large subunit	+	1.4.1.13	0.973539	118.931	1.4.1.13	glutamate synthase (NADPH)	20
P21G12	not identified		not identified					0.981302	103.782
P21H1	not identified		not identified					0.990484	95.6485
	* Since the originally used genome annotation NC_006958 is not available anymore at NCBI the annotation NC_003450 was additionally used for the identification of insertion points.
